# Supplementary material
Source: Springer Nature journal article supplement (https://www.springermedizin.de/resource/supplementary/12879_2013_2443_MOESM3_ESM.pdf/9444590)
Supplement: MOESM3 [file 9444590]

Table 3: Psychosocial and health service related factors among study participants comparing adherent and non-adherent using a Chi-Square test in Tigray regional state, northern Ethiopia, 2012

| Characteristics of study participants      | Status of adherence to ART        |                               | P-value |
|--------------------------------------------|-----------------------------------|-------------------------------|---------|
|                                            | Non-adherent to ART<br>Number (%) | Adherent to ART<br>Number (%) |         |
| Current cigarette smoking (within 30 days) |                                   |                               | 0.431   |
| Yes                                        | 16(9.2)                           | 12(6.9)                       |         |
| No                                         | 158(90.8)                         | 162(93.1)                     |         |
| Ever cigarette smoking after starting ART  |                                   |                               | 0.855   |
| Yes                                        | 16(9.2)                           | 17(9.8)                       |         |
| No                                         | 158(90.8)                         | 157(90.2)                     |         |
| Ever khat chewing after starting ART       |                                   |                               | 0.149   |
| Yes                                        | 21(12.1)                          | 13(7.5)                       |         |
| No                                         | 153(87.9)                         | 161(92.5)                     |         |
| Disclosure of ART use                      |                                   |                               | 0.659   |
| Yes                                        | 148(85.1)                         | 145(83.3)                     |         |
| No                                         | 26(14.9)                          | 29(16.7)                      |         |
| Family support for ART use                 |                                   |                               | 0.411   |
| Yes                                        | 117(75.5)                         | 116(79.5)                     |         |
| No                                         | 38(24.5)                          | 30(20.5)                      |         |
| Satisfaction by ART benefit                |                                   |                               | 0.251   |
| Yes                                        | 113(64.9)                         | 123(70.7)                     |         |
| No                                         | 61(35.1)                          | 51(29.3)                      |         |
| PHQ-9 score for depression (points)        |                                   |                               | 0.000   |
| 0 – 4                                      | 53(30.5)                          | 115(66.1)                     |         |
| 5 – 9                                      | 72(41.4)                          | 50(28.7)                      |         |
| 10 – 14                                    | 28(16.1)                          | 8(4.6)                        |         |
| 15 – 27                                    | 21(12)                            | 1(0.6)                        |         |
| Functional status in last 3 months         |                                   |                               | 0.006   |
| Working actively                           | 152(87.3)                         | 168(96.6)                     |         |
| Ambulatory                                 | 22(12.7)                          | 6(3.4)                        |         |
